# Supplementary material for: A systematic review and meta-analysis of magnetic resonance and computed tomography enterography in the diagnosis of small intestinal tumors
Source: PeerJ. 2023 Dec 21;11:e16687. doi: 10.7717/peerj.16687 (PMC10749088; doi:10.7717/peerj.16687)
Supplement: Supplemental Information 1 [file peerj-11-16687-s001.xlsx]

## Sheet: table1
Author, Year	Age range	Diagnostic gold standard	Number of cases
Feng Hao,2022[14]	21-58	pathology	70
Wang Zi,2015[12]	15-72	pathology	65
Chen Zhonggeng,2017[11]	34-68	pathology	58
Zhuang Xiaozhao,2018[10]	18-68	pathology	60
Zhang Chun,2018[13]	34-69	pathology	50
Zhao Guoying,2017[9]	22-79	pathology	96
Yang Chao,2019[7]	45-71	pathology	74
Fu Lili,2016[8]	46-69	pathology	78

## Sheet: Forest map
MR diagnosis					CT enterography
TP	FP	FN	TN		TP	FP	FN	TN
48	3	4	15		49	3	5	17
46	4	3	12		46	4	2	13
34	4	5	15		33	4	4	17
30	5	3	22		30	4	3	23
32	3	2	13		32	2	2	14
71	4	5	16		72	4	3	17
41	3	5	25		39	4	5	26
55	5	3	15		47	5	2	16
Forest map for the sensitivity and specificity of CT and Harmony.

## Sheet: table3
MR diagnosis					CT enterography
TP	FP	FN	TN		TP	FP	FN	TN
48	3	4	15		49	3	5	17
46	4	3	12		46	4	2	13
34	4	5	15		33	4	4	17
30	5	3	22		30	4	3	23
32	3	2	13		32	2	2	14
71	4	5	16		72	4	3	17
41	3	5	25		39	4	5	26
55	5	3	15		47	5	2	16

## Sheet: SROC diagram
MR diagnosis					CT enterography
TP	FP	FN	TN		TP	FP	FN	TN
48	3	4	15		49	3	5	17
46	4	3	12		46	4	2	13
34	4	5	15		33	4	4	17
30	5	3	22		30	4	3	23
32	3	2	13		32	2	2	14
71	4	5	16		72	4	3	17
41	3	5	25		39	4	5	26
55	5	3	15		47	5	2	16
SROC diagram for the comparison of diagnostic accuracy between CT and MRI

## Sheet: Deek's funnel
MR diagnosis					CT enterography
TP	FP	FN	TN		TP	FP	FN	TN
48	3	4	15		49	3	5	17
46	4	3	12		46	4	2	13
34	4	5	15		33	4	4	17
30	5	3	22		30	4	3	23
32	3	2	13		32	2	2	14
71	4	5	16		72	4	3	17
41	3	5	25		39	4	5	26
55	5	3	15		47	5	2	16
Deek's funnel chart that verified that there is no significant publication bias in this study

## Sheet: Fagan diagram
MR diagnosis					CT enterography
TP	FP	FN	TN		TP	FP	FN	TN
48	3	4	15		49	3	5	17
46	4	3	12		46	4	2	13
34	4	5	15		33	4	4	17
30	5	3	22		30	4	3	23
32	3	2	13		32	2	2	14
71	4	5	16		72	4	3	17
41	3	5	25		39	4	5	26
55	5	3	15		47	5	2	16
Fagan diagram that showed the relationship between prior probability, likelihood ratio and posterior probability
